# Supplementary material for: Metal node exchange-driven ligand-strain modulation strategy for one-dimensional crystalline coordination polymers
Source: Royal Society of Chemistry journal article supplement (doi:10.1039/d4qi02422b), 2024-01-01
Supplement: d4qi02422b1.pdf [file d4qi02422b1.pdf]

# **Electronic Supplementary Information (ESI)**

*for*

## **Metal Node Exchange-Driven Ligand-Strain Modulation Strategy for One-Dimensional Crystalline Coordination Polymers**

Gengxin Wu,<sup>a</sup> Yong-Kang Zhu,<sup>a</sup> Dongxia Li,<sup>a</sup> Jia-Rui Wu,<sup>a,b</sup> Yan Wang,<sup>\*a</sup> Zhiquan Zhang,<sup>\*a</sup> and  
Ying-Wei Yang<sup>\*a</sup>

<sup>a</sup> College of Chemistry, Jilin University, 2699 Qianjin Street, Changchun 130012, P. R. China

<sup>b</sup> Key Laboratory of Automobile Materials of Ministry of Education and School of Materials Science and Engineering, Jilin University, Changchun 130025, P. R. China

\*E-mail: wangy2011@jlu.edu.cn; zzq@jlu.edu.cn; ywyang@jlu.edu.cn

## 1. Materials and methods

Unless otherwise noted, all reagents and solvents were commercially available and used without further purification.  $^1\text{H}$  and  $^{13}\text{C}$  NMR spectra were recorded at 298 K on a Bruker AVANCEIII 400 MHz instrument at room temperature. Chemical shifts were referred to TMS. Mass spectra were recorded on Bruker Daltonics Autoflex Speed Series: a Bruker Agilent1290-microTOF Q II High-resolution (HR) mass spectrometry instrument. Single-crystal X-ray diffraction data were recorded on a Bruker APEX-II CCD diffractometer using the  $\omega$ -scan mode with graphite-monochromator Ga  $K\alpha$  radiation ( $\lambda = 1.34139$ ). Powder X-ray diffraction (PXRD) measurements were collected on a PANalytical B.V. Empyrean powder diffractometer operating at 40 kV/30 mA using the Cu  $K\alpha$  line ( $\lambda = 1.5418 \text{ \AA}$ ). Data were measured over the range of  $5\text{-}50^\circ$  in  $5^\circ/\text{min}$  steps over 8 min. UV-vis spectra were obtained on a Shimadzu UV-2550 spectrometer. The fluorescence spectra were recorded on a Shimadzu RF-5301PC fluorescence spectrophotometer. The time-resolved fluorescence decay curves and absolute fluorescence quantum yields were obtained on a FLS920 instrument (Edinburgh Instrument) with an excitation of 280 nm. Quantum yields were calculated using an integrating sphere. Thermogravimetric (TG) analysis was performed using a NETZSCH STA 449C instrument, and the samples were heated up to  $900^\circ\text{C}$  at a rate of  $10^\circ\text{C min}^{-1}$  under a nitrogen atmosphere. The surface area analysis of samples was measured using a BET analyzer (Micrometrics ASAP 2020 PlusHD88) by nitrogen adsorption and desorption at 77 K. The sample was degassed at  $120^\circ\text{C}$  for 12 hours under a vacuum before the analysis. Scanning electron microscope (SEM) and energy dispersive spectroscopy (EDS) images were collected on a HITACHI SU8082 instrument. The X-ray photoelectron spectroscopy was carried out on a Shimadzu/Krayos AXIS Ultra DLD by sticking the powder sample to conductive paste.

## 2. Experimental section

### 2.1 Synthesis of ligand

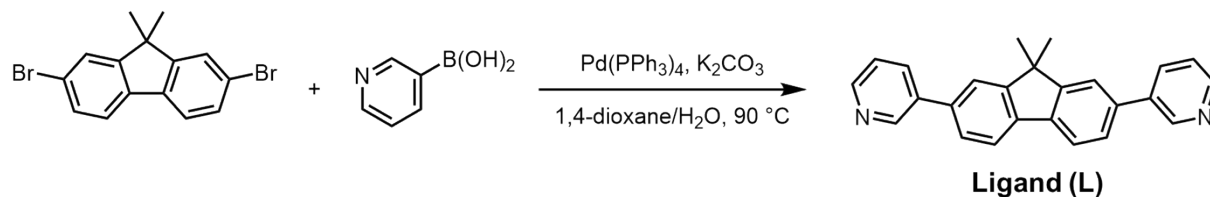

**Scheme S1.** Synthesis of ligand (**L**).

2,7-Dibromo-9,9-dimethylfluorene (1.0 g, 2.8 mmol), 3-pyridylboronic acid (1.0 g, 8.4 mmol), Pd(PPh<sub>3</sub>)<sub>4</sub> (0.3 g, 0.28 mmol) and K<sub>2</sub>CO<sub>3</sub> (1.5 g, 11.2 mmol) were added in a mixed solvent of dioxane and water (5:1, 120 mL) in a flask. The resulting mixture was stirred under a nitrogen atmosphere at 90 °C for 12 hours. After evaporating the solvents, the residue was extracted with CH<sub>2</sub>Cl<sub>2</sub> and then washed with water and brine. The organic layer was dried over anhydrous Na<sub>2</sub>SO<sub>4</sub>, concentrated under vacuum, and further purified by silica gel column chromatography to afford 0.9 g **L** (yield: 92%). <sup>1</sup>H NMR (400 MHz, CDCl<sub>3</sub>, 298 K): δ 8.93 (d, *J* = 2.4 Hz, 2H), 8.62 (dd, *J* = 6.4, 2.0 Hz, 2H), 8.03 – 7.91 (m, 2H), 7.86 (d, *J* = 10.4 Hz, 2H), 7.66 (d, *J* = 1.6 Hz, 2H), 7.64 – 7.55 (m, 2H), 7.45 – 7.33 (m, 2H), 1.60 (s, 6H). <sup>13</sup>C NMR (101 MHz, CDCl<sub>3</sub>, 298 K): δ 154.8, 148.5, 148.4, 138.6, 137.3, 136.9, 134.4, 126.4, 123.6, 121.5, 120.9, 47.2, 27.3. HRMS (*m/z*): [M+H]<sup>+</sup> calcd for C<sub>25</sub>H<sub>21</sub>N<sub>2</sub><sup>+</sup>, 349.1699, found 349.1614.

### 2.2 Preparation of Ag(I)-L and Cu(I)-L

AgNO<sub>3</sub> (19 mg, 0.1 mmol) or CuI (17 mg, 0.1 mmol) was dissolved in CH<sub>3</sub>CN (6 mL) and added to CH<sub>2</sub>Cl<sub>2</sub> (6 mL) solution of **L** (34.8 mg, 0.1 mmol). The mixture was stirred for 10 minutes to give a white (**Ag(I)-L**, 36 mg) or yellow (**Cu(I)-L**, 32 mg) precipitate. The precipitate was filtered off, washed several times with CH<sub>3</sub>CN and CH<sub>2</sub>Cl<sub>2</sub>, and then dried under vacuum for further use.

### 2.3 Preparation of metal exchange products Ex-s and Ex-g

**Ex-s:** After the formation of **Ag(I)-L**, the dried powder (20 mg) was dispersed in CH<sub>3</sub>CN. Subsequently, CuI (20 mg) was slowly added to the suspension under stirring, followed by another 5 min stirring at room temperature. Then, an obvious color change from white to yellow was observed. After removing the solvents, the resulting precipitate was washed with CH<sub>3</sub>CN, H<sub>2</sub>O, and a solution of KI, respectively, to afford the exchanged product **Ex-s**.

**Ex-g:** The mixture of **Ag(I)-L** (20 mg) and CuI (20 mg) was grounded in a mortar for 30 min, followed by washing with CH<sub>3</sub>CN, H<sub>2</sub>O, and the solution of KI, respectively, to afford the exchanged product **Ex-g**.

### 3. NMR and mass spectroscopy

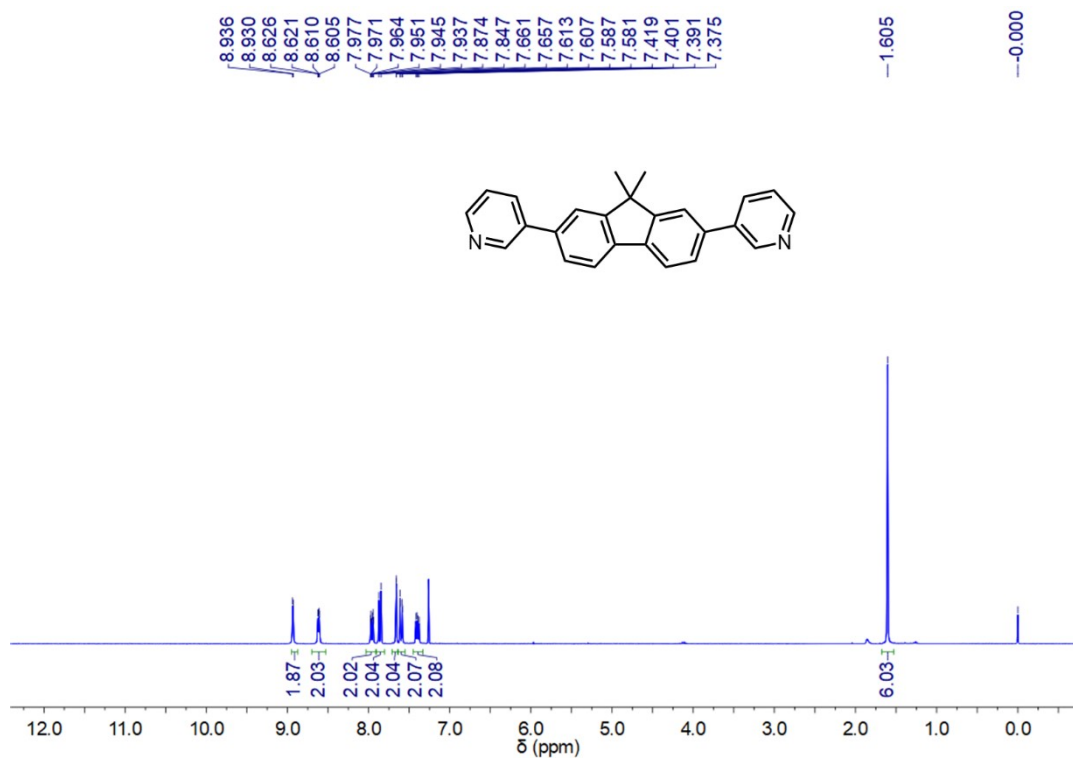

**Figure S1.** <sup>1</sup>H NMR spectrum (400 MHz, CDCl<sub>3</sub>, 298 K) of **L**.

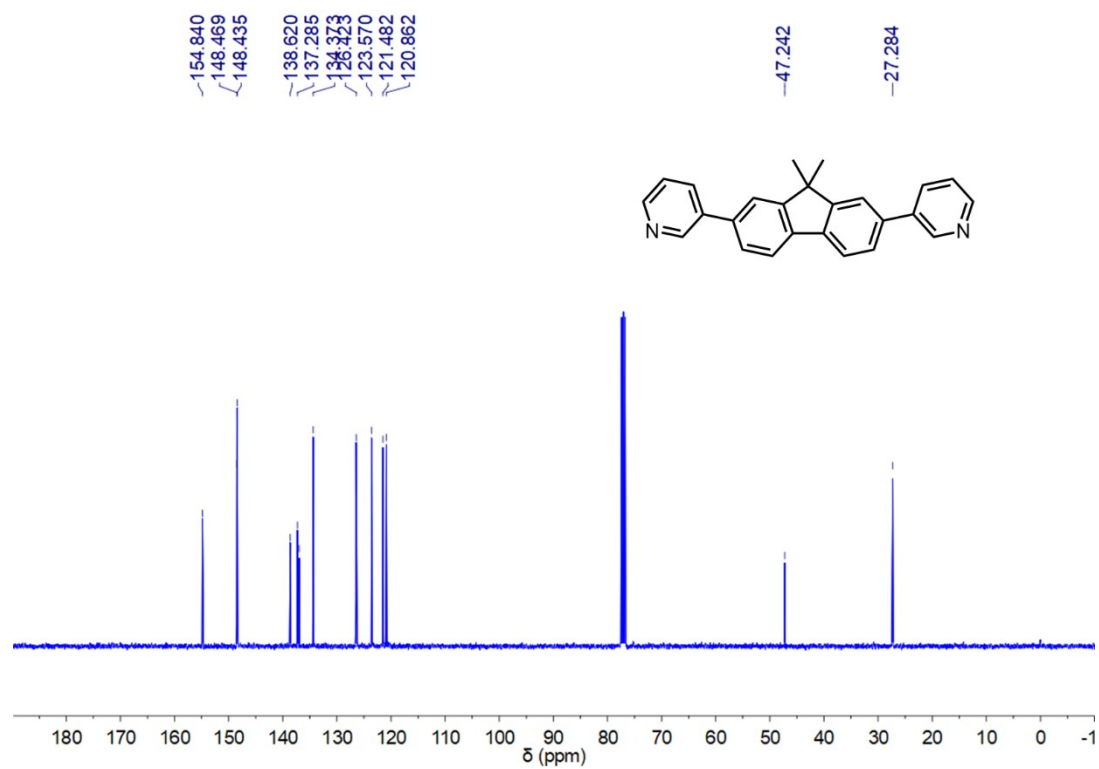

**Figure S2.** <sup>13</sup>C NMR spectrum (101 MHz, CDCl<sub>3</sub>, 298 K) of L.

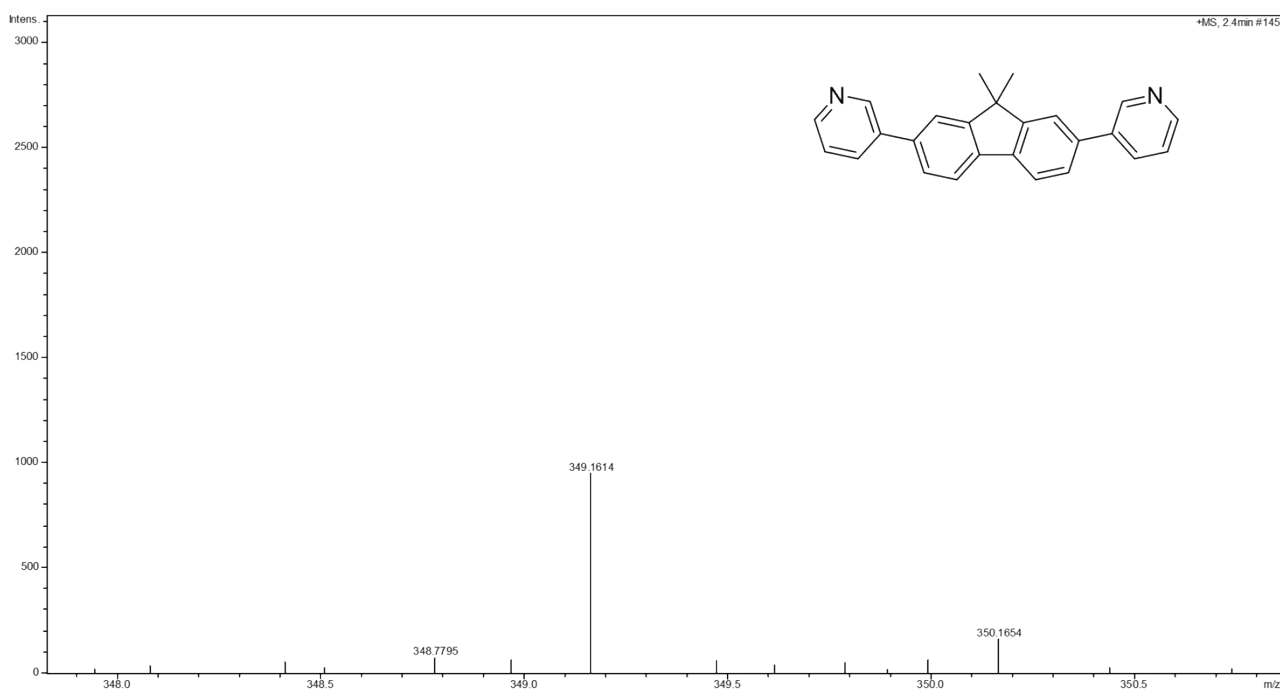

**Figure S3.** HRMS spectrum of L: [M+H]<sup>+</sup> calcd for C<sub>25</sub>H<sub>21</sub>N<sub>2</sub><sup>+</sup>, 349.1699, found 349.1614.

#### 4. Crystal structure analysis

**Ag(I)-L:** A solution of **Ag(I)-L** powder in dimethyl sulfoxide (0.5 mL) was added to a 2 mL glass bottle, followed by the addition of MeCN (0.2 mL), forming two distinct layers. Then colorless block crystals suitable for X-ray structural determination were obtained by slow diffusion of two phases after 24 hours.

**Cu(I)-L:** Yellow block crystals were grown by slow volatilization of a solution of **Cu(I)-L** powder in dimethyl sulfoxide (0.5 mL). After 24 hours, crystals suitable for X-ray structural determination were obtained.

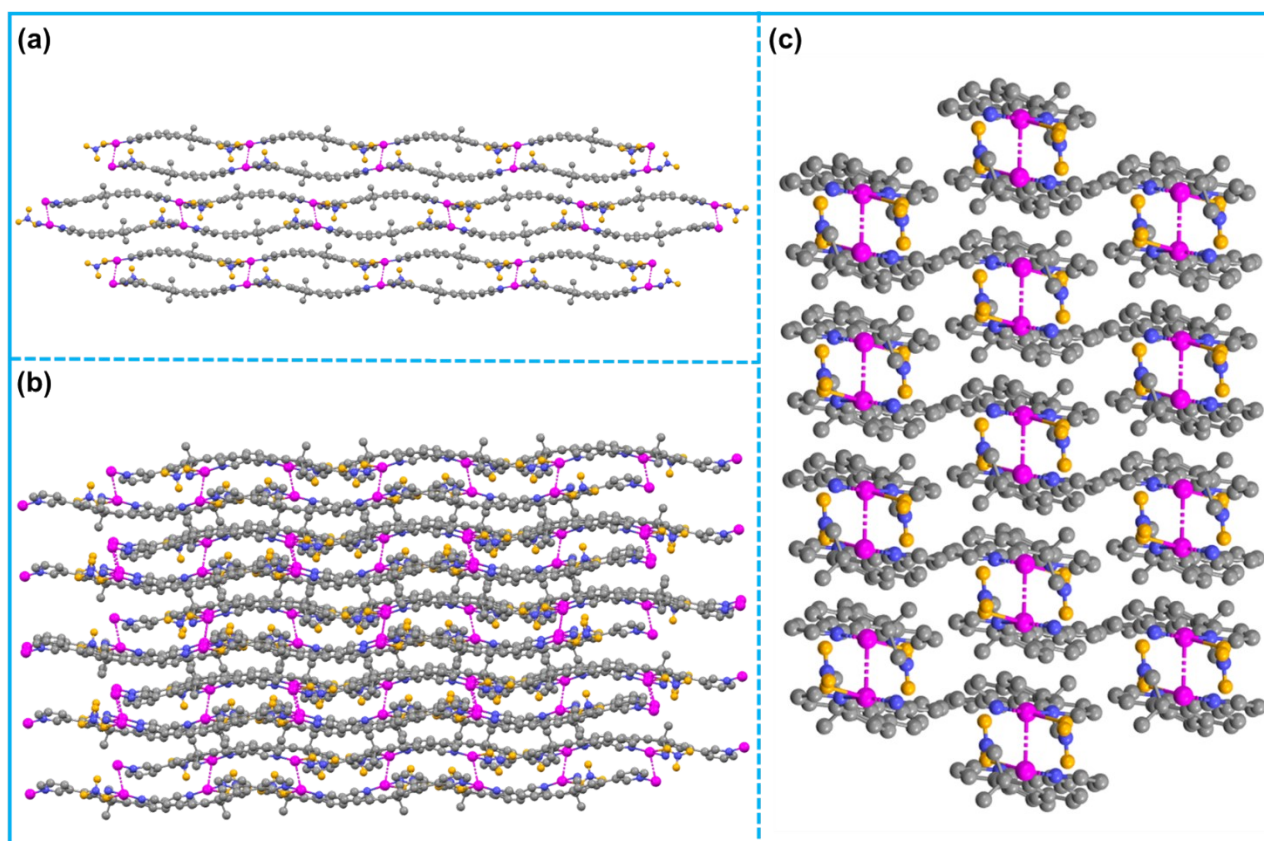

**Figure S4.** X-ray crystal structure and molecular packing of **Ag(I)-L** viewed along the *a*, *b*, and *c* axis. Hydrogen atoms are omitted for clarity.

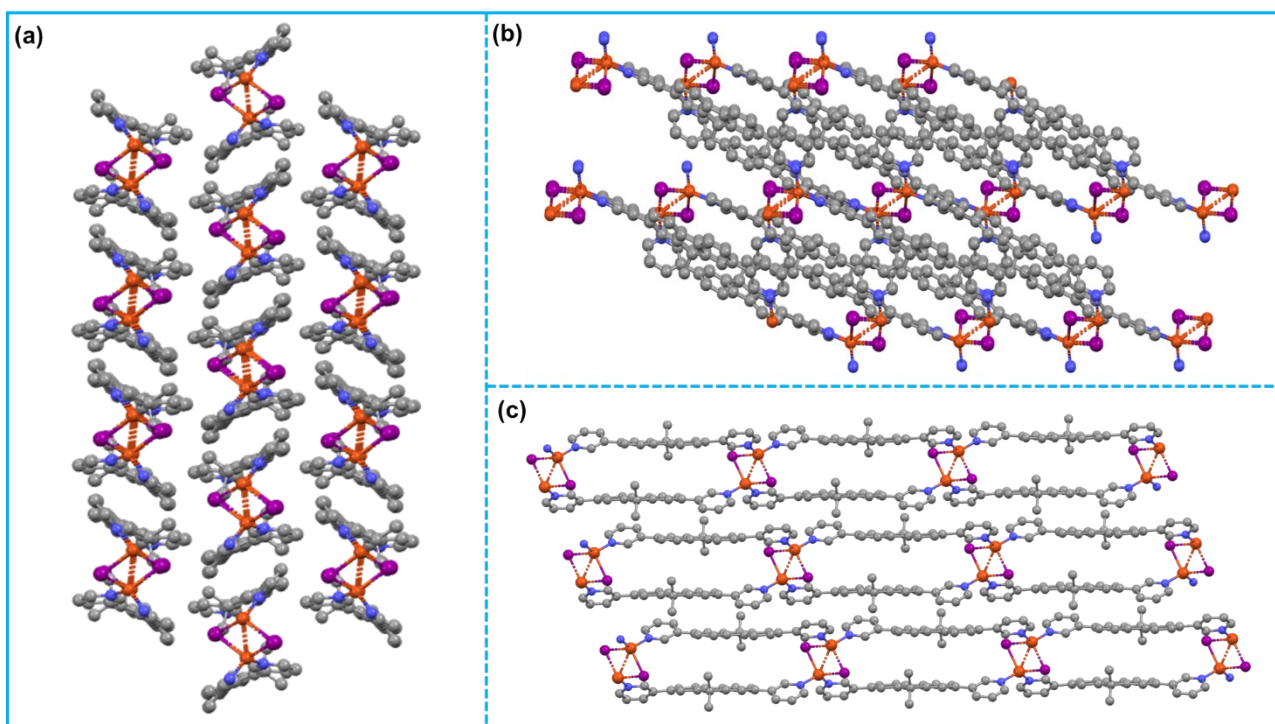

**Figure S5.** X-ray crystal structure and molecular packing of **Cu(I)-L** viewed along the *a*, *b*, and *c* axis. Hydrogen atoms are omitted for clarity.

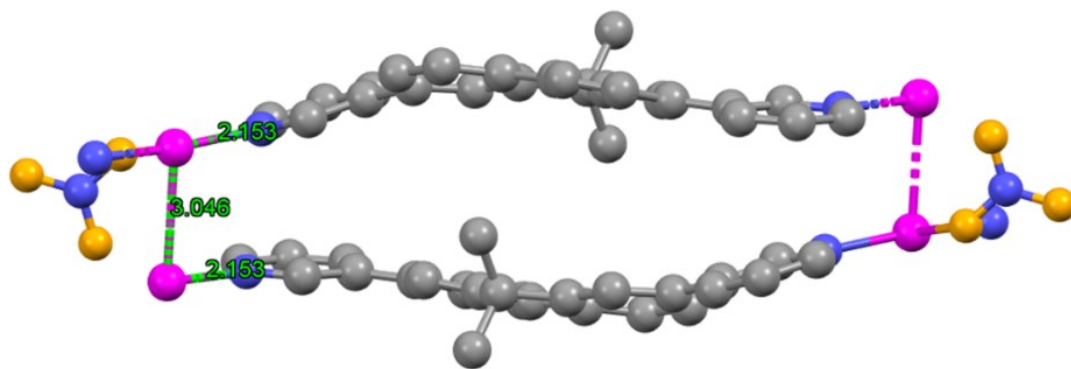

**Figure S6.** Illustration of the distance between  $\text{Ag}^+-\text{Ag}^+$  connection and  $\text{Ag}^+\cdots\text{N}$  bonds in **Ag(I)-L**.

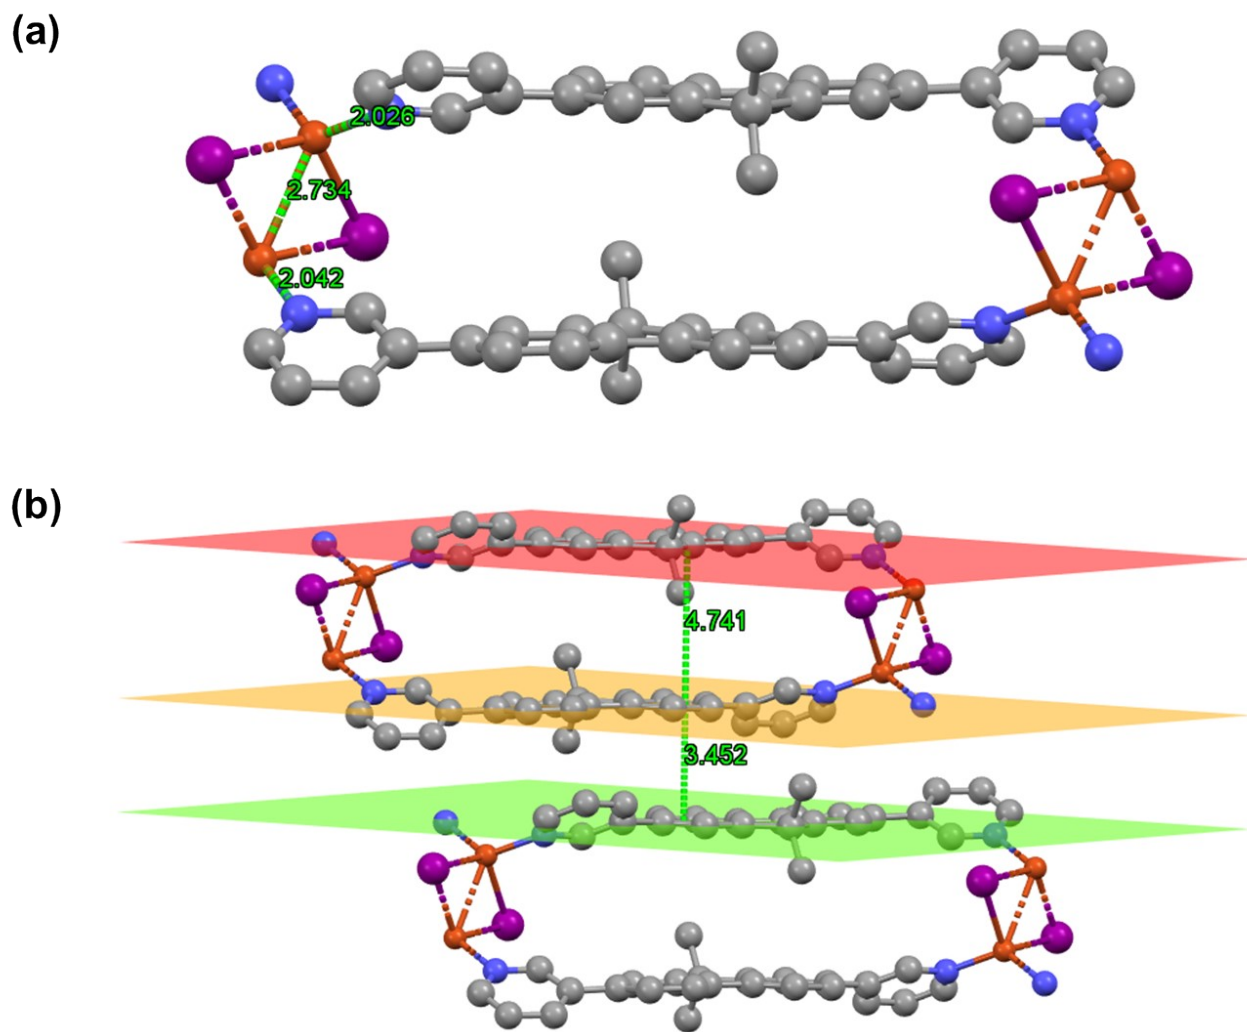

**Figure S7.** (a) Illustration of the distance between  $\text{Cu}^+ - \text{Cu}^+$  connection and  $\text{Cu} - \text{N}$  bonds. (b) The distances between the two parallel ligands and two adjacent ligands in  $\text{Cu}(\text{I})\text{-L}$ .



**Table S1.** Single crystal data of **Ag(I)-L** and **Cu(I)-L**

| Compound                                                          | <b>Ag(I)-L</b>                                                  | <b>Cu(I)-L</b>                                    |
|-------------------------------------------------------------------|-----------------------------------------------------------------|---------------------------------------------------|
| Empirical formula                                                 | C <sub>25</sub> H <sub>20</sub> AgN <sub>3</sub> O <sub>3</sub> | C <sub>25</sub> H <sub>20</sub> CuIN <sub>2</sub> |
| Formula weight                                                    | 517.86                                                          | 538.88                                            |
| Crystal system                                                    | monoclinic                                                      | monoclinic                                        |
| Space group                                                       | P2 <sub>1</sub> /n                                              | P2 <sub>1</sub> /c                                |
| <i>a</i> /Å                                                       | 8.9941(7)                                                       | 9.4863(7)                                         |
| <i>b</i> /Å                                                       | 16.8525(14)                                                     | 14.7718(11)                                       |
| <i>c</i> /Å                                                       | 14.0933(12)                                                     | 15.7131(12)                                       |
| <i>a</i> /deg.                                                    | 90                                                              | 90                                                |
| <i>b</i> /deg.                                                    | 100.638(3)                                                      | 101.323(3)                                        |
| <i>γ</i> /deg.                                                    | 90                                                              | 90                                                |
| <i>V</i> /Å <sup>3</sup>                                          | 2099.5(3)                                                       | 2159.0(3)                                         |
| <i>Z</i>                                                          | 42                                                              | 43                                                |
| ρ <sub>calc</sub> /cm <sup>3</sup>                                | 1.640                                                           | 1.658                                             |
| μ/mm <sup>-1</sup>                                                | 5.332                                                           | 13.054                                            |
| <i>F</i> (000)                                                    | 1048.0                                                          | 1064.0                                            |
| Theta range/deg.                                                  | 7.188 to 114.602                                                | 7.212 to 114.178                                  |
| Reflections collected                                             | 18789                                                           | 20172                                             |
| <i>R</i> (int)                                                    | 0.0376                                                          | 0.0441                                            |
| R <sub>1</sub> , wR <sub>2</sub> [obs <i>I</i> > 2σ ( <i>I</i> )] | R <sub>1</sub> = 0.0246, wR <sub>2</sub> = 0.0634               | R <sub>1</sub> = 0.0298, wR <sub>2</sub> = 0.0746 |
| R <sub>1</sub> , wR <sub>2</sub> (all data)                       | R <sub>1</sub> = 0.0274, wR <sub>2</sub> = 0.0649               | R <sub>1</sub> = 0.0341, wR <sub>2</sub> = 0.0764 |
| CCDC number                                                       | 2333130                                                         | 2333129                                           |

## 5. Characterizations of Ag(I)-L and Cu(I)-L

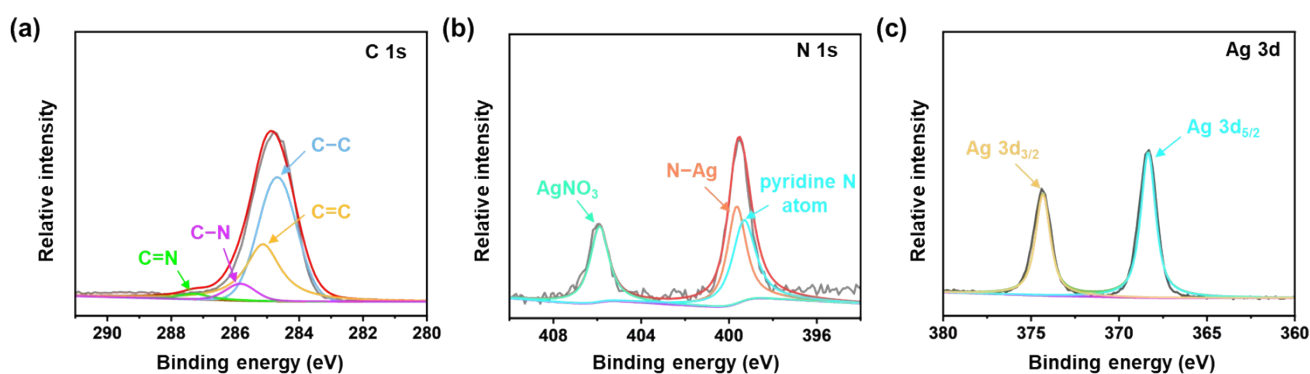

Figure S8. XPS spectra of Ag(I)-L. (a) C 1s, (b) N 1s, and (c) Ag 3d.

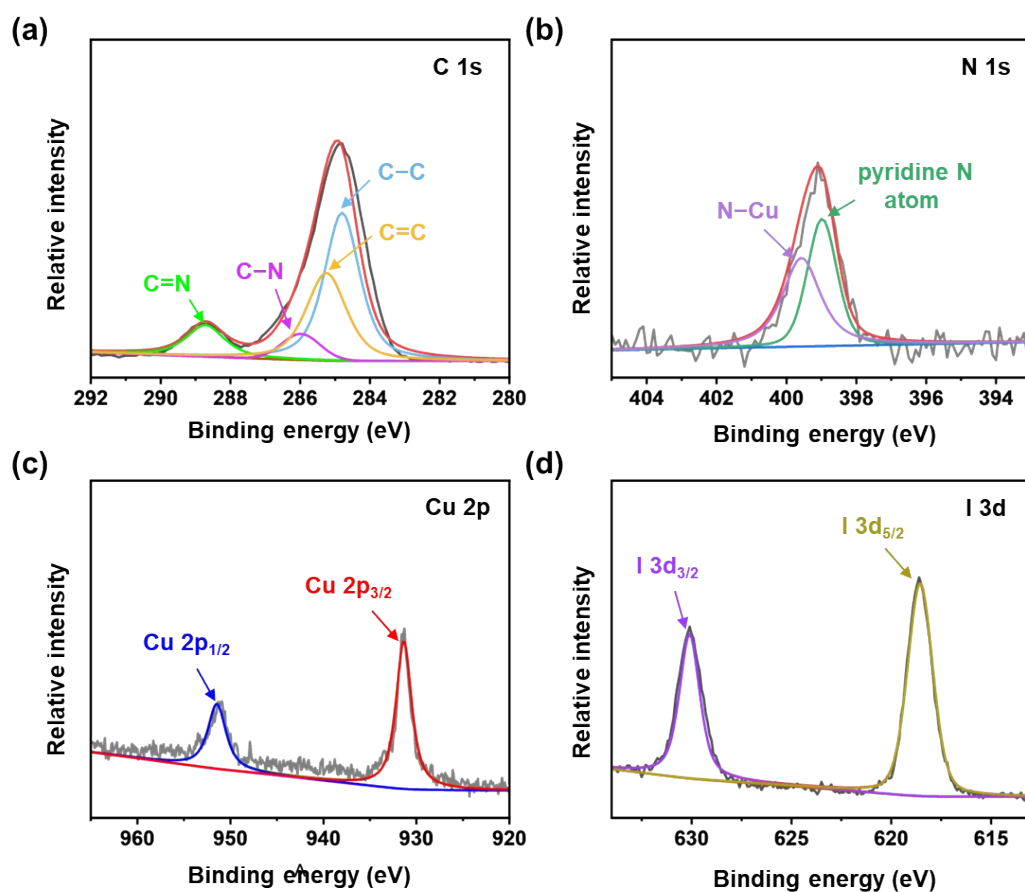

Figure S9. XPS spectra of Cu(I)-L. (a) C 1s, (b) N 1s, (c) Cu 2p, and (d) I 3d.

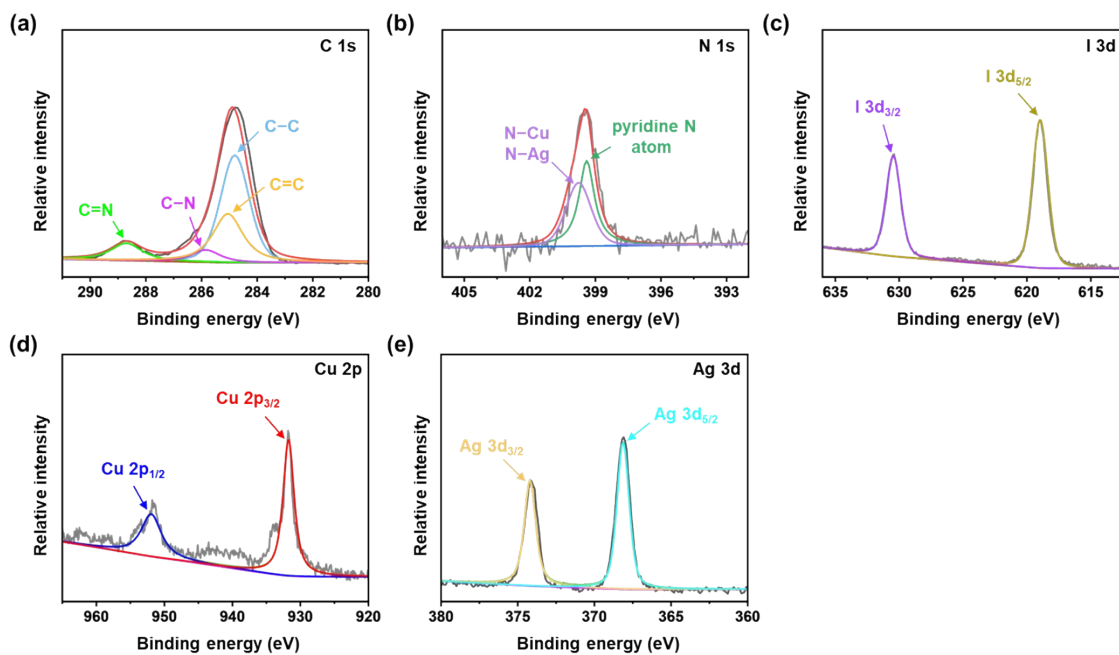

**Figure S10.** XPS spectra of *Ex-g*. (a) C 1s, (b) N 1s, (c) I 3d, (d) Cu 2p, and (e) Ag 3d.

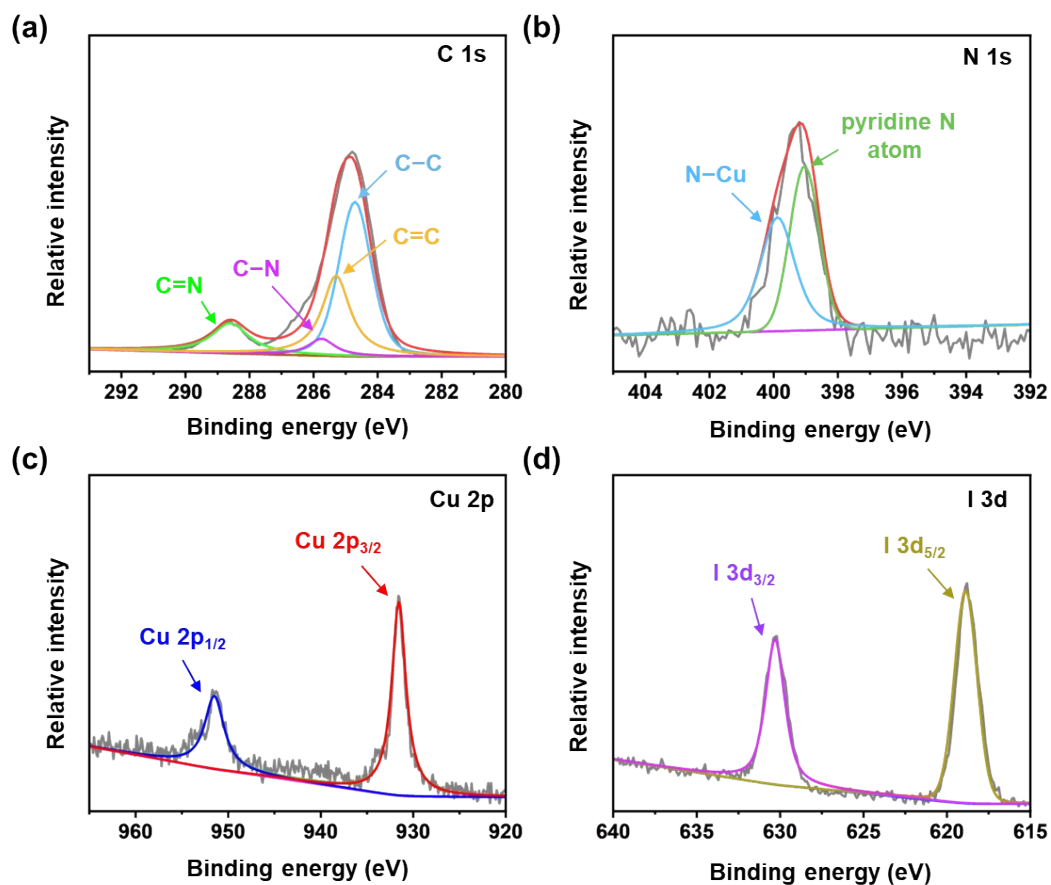

**Figure S11.** XPS spectra of *Ex-s*. (a) C 1s, (b) N 1s, (c) Cu 2p, and (d) I 3d.

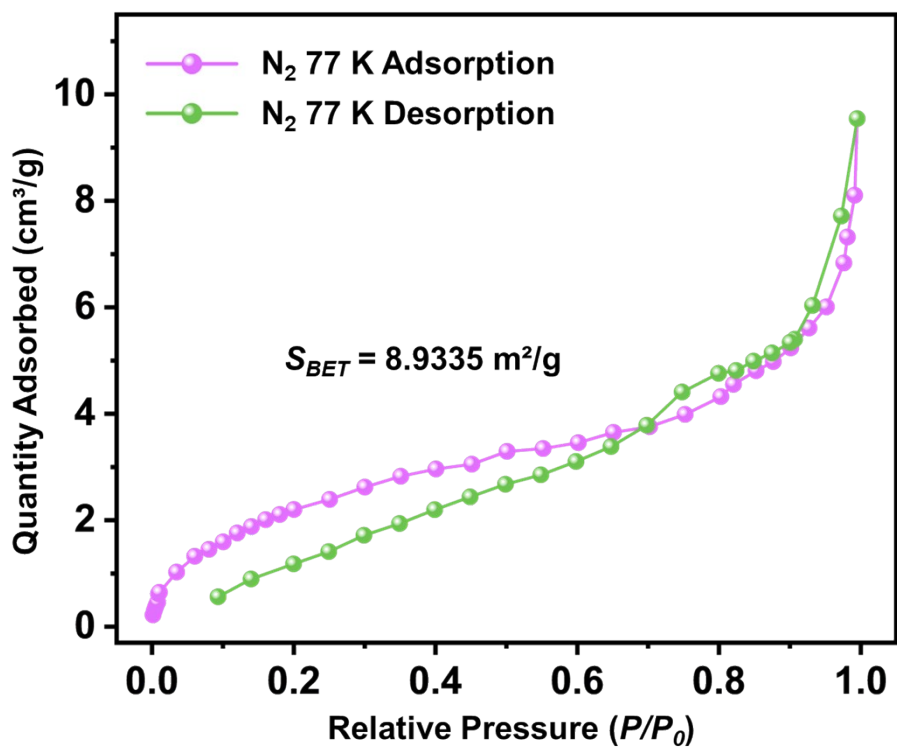

Figure S12. BET measurement of Ag(I)-L using N<sub>2</sub> at 77 K.

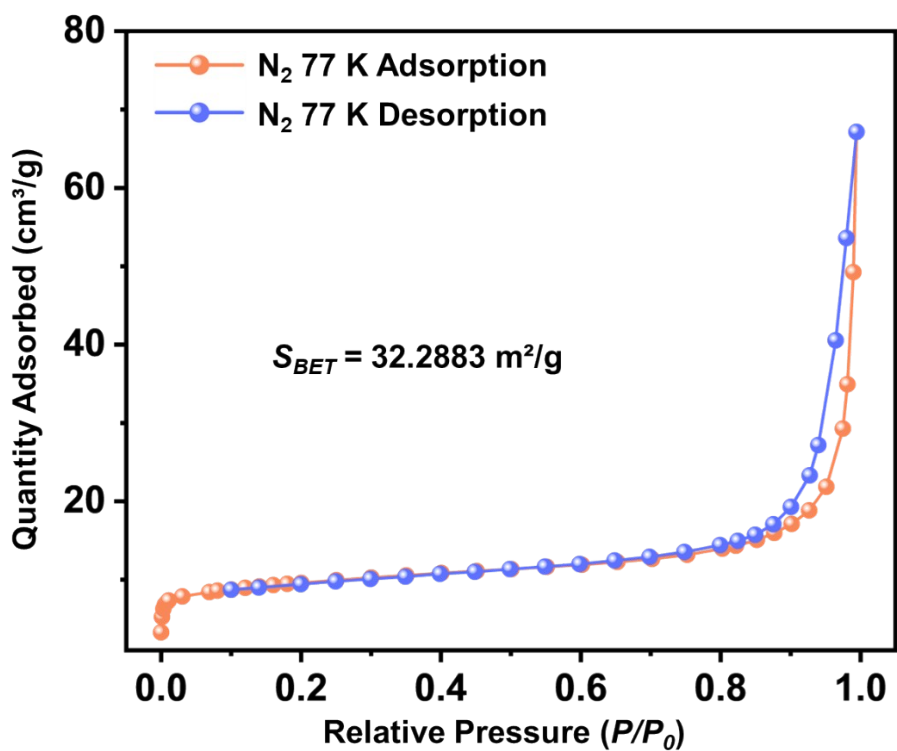

Figure S13. BET measurement of Cu(I)-L using N<sub>2</sub> at 77 K.

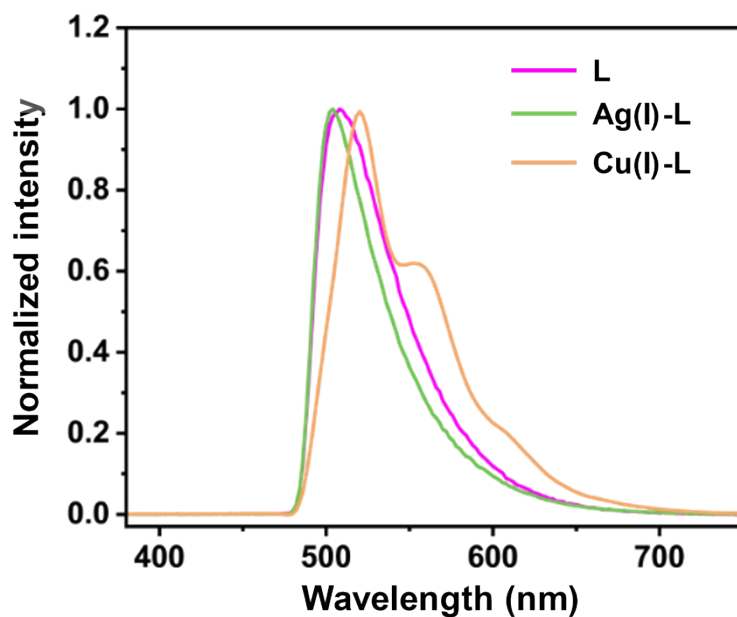

**Figure S14.** Normalized PL spectra of **L** (pink), **Ag(I)-L** (green), and **Cu(I)-L** (orange) in the solid states. Note:  $\lambda_{ex} = 320$  nm.

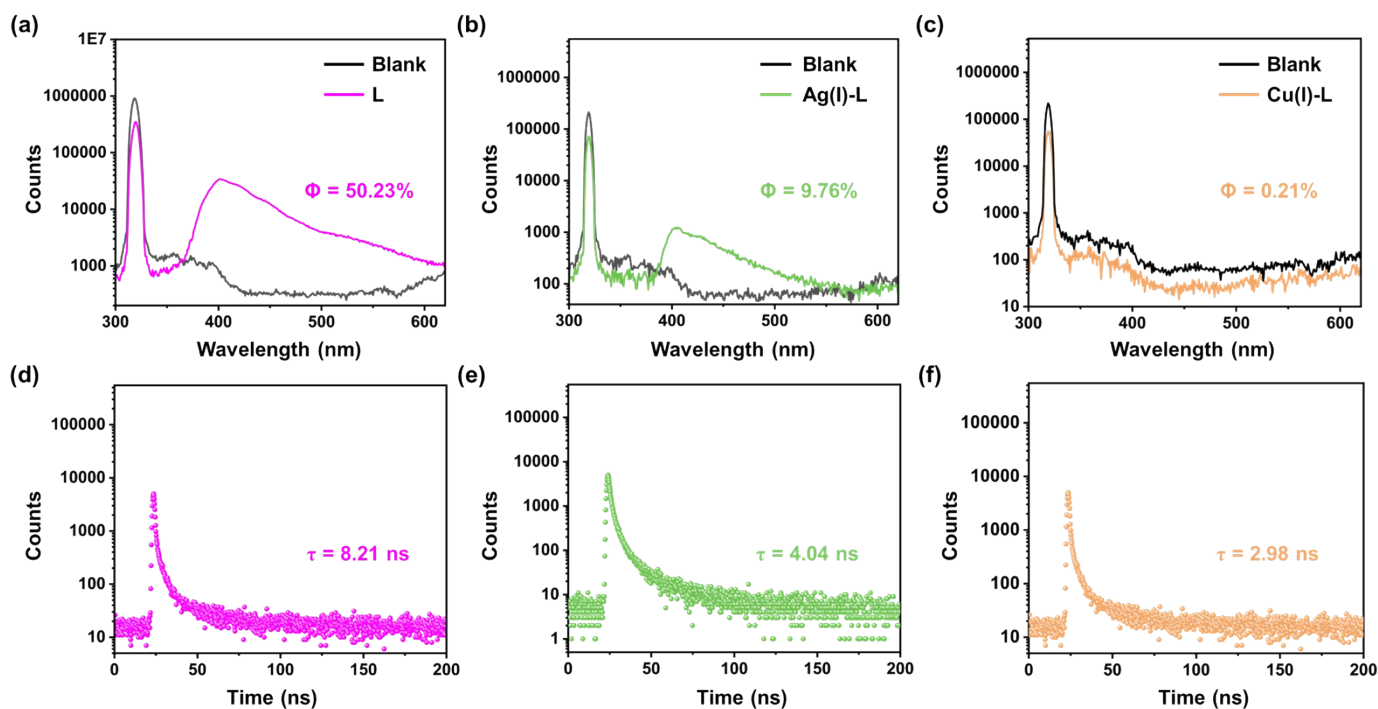

**Figure S15.** Fluorescence quantum efficiencies and lifetimes of (a,d) **L** (pink), (b,e) **Ag(I)-L** (green), and (c,f) **Cu(I)-L** (orange) in solid states. Note:  $\lambda_{ex} = 320$  nm.

**Table S2.** Analytical results of Ag and Cu determined by ICP-AES

| <b>Sample</b>  | <b>Method</b> | <b>Ag (%)</b> | <b>Cu (%)</b> |
|----------------|---------------|---------------|---------------|
| <b>Ag(I)-L</b> | Calculated    | 20.81         | 0             |
|                | Experiment    | 9.83          | 0             |
| <b>Cu(I)-L</b> | Calculated    | 0             | 11.79         |
|                | Experiment    | 0             | 16.91         |
| <b>Ex-s</b>    | Calculated    | 0             | 11.79         |
|                | Experiment    | 0.25          | 16.19         |
| <b>Ex-g</b>    | Calculated    | 0             | 11.79         |
|                | Experiment    | 6.58          | 13.64         |
